# Supplementary material for: Cetacean Strandings From Space: Challenges and Opportunities of Very High Resolution Satellites for the Remote Monitoring of Cetacean Mass Strandings
Source: Frontiers journal article supplement (doi:10.3389/fmars.2021.650735), 2021-11-18
Supplement: Table_1.xlsx [file Table_1.xlsx]

## Sheet: Sheet1
Name of Satellite	Operator/Owner	Providor	Type of Orbit	PAN spatial resolution at nadir (m)	MUL spatial resolution at nadir (m)	No. of Multispectral Bands	Maximum daily acquisition	Swath Width	Multi Image Collection - Single Pass	Revisit rate	Date Launched	Years of Service	State	Reference	Notes
CartoSat-2	Indian Space Research Organization (ISRO)	Government	Polar Sun Synchronous	<1m	N/A	0 (panchromatic only)		9.6km			2007-01-10	5	Operational	https://www.isro.gov.in/Spacecraft/cartosat-2-0 https://www.ucsusa.org/resources/satellite-database https://eoportal.org/web/eoportal/satellite-missions/c-missions/cartosat-2
CartoSat-2A	Indian Space Research Organization (ISRO)	Military	Polar Sun Synchronous	<1m	N/A	0 (panchromatic only)		9.6km			2008-04-28	5	Operational	https://www.isro.gov.in/Spacecraft/cartosat-–-2a https://www.ucsusa.org/resources/satellite-database
CartoSat-2B	Indian Space Research Organization (ISRO)	Government		Capable	N/A	0 (panchromatic only)		9.6km			2010-07-12	5	Operational	https://www.isro.gov.in/Spacecraft/cartosat-2b https://www.ucsusa.org/resources/satellite-database
CartoSat-2C	Indian Space Research Organization (ISRO)	Government (lower orbit for military use)	Polar Sun Synchronous	Capable	Capable						2016-06-22	5	Operational	https://www.ucsusa.org/resources/satellite-database
CartoSat-2D	Indian Space Research Organization (ISRO)	Government	Polar Sun Synchronous	0.65m	Capable			9.6km			2017-02-15	5	Operational	https://www.isro.gov.in/Spacecraft/cartosat-2-series-satellite-0 https://www.ucsusa.org/resources/satellite-database and https://eoportal.org/web/eoportal/satellite-missions/c-missions/cartosat-2d
CartoSat-2E	Indian Space Research Organization (ISRO)	Government		0.65m	2m			9.6km			2017-06-23	5	Operational	https://www.isro.gov.in/Spacecraft/cartosat-2-series-satellite-1 https://www.ucsusa.org/resources/satellite-database https://eoportal.org/web/eoportal/satellite-missions/c-missions/cartosat-2e
CartoSat-2F	Indian Space Research Organization (ISRO)	Government									2018-01-12	5	Operational	https://www.isro.gov.in/Spacecraft/cartosat-2-series-satellite-2 https://www.ucsusa.org/resources/satellite-database
Cartosat-3	Indian Space Research Organization (ISRO)	Government									2019-11-27	5	Operational	https://www.isro.gov.in/Spacecraft/cartosat-3 https://www.ucsusa.org/resources/satellite-database
Deimos-2	Deimos Imaging	Commercial	Sun-Synchronous	0.75m	3m	4	200,000 km² per day	12 km at nadir		2 Days at mid latitudes or 4 Days	2014-06-19	until 2024+	Operational	https://www.deimos-imaging.com/app/uploads/2020/09/Our-Virtual-Constellation_September-2020.pdf https://eoportal.org/web/eoportal/satellite-missions/d/deimos-2 https://geocento.com/satellite-imagery-gallery/deimos-2/
EROS-B	ImageSat International N. V.	Military/Commercial	Sun-Synchronous	0.65m	N/A	0 (panchromatic only)		7km		5-6 days	2006-04-25	2006/2022	Operational	https://www.imagesatintl.com/wp-content/brochure/EROS-B_Satellite_Brochure.pdf https://www.ucsusa.org/resources/satellite-database and https://earth.esa.int/web/eoportal/satellite-missions/e/eros-b and https://geocento.com/satellite-imagery-gallery/eros-b/	UCS - MoD owns all rights to images of Israel and territories with 2000km
Gaofen-2	China National Space Administration	Government	Sun-Synchronous	0.81m	3.24m	4		45km		5 days	2014-08-19	8	Operational	https://www.ucsusa.org/resources/satellite-database https://www.satimagingcorp.com/satellite-sensors/gaofen-2/
GeoEye-1	Maxar Technologies Inc.	Commercial	Sun-Synchronous	0.46m	1.84m	4	350,000 km² per day	15.2km x 360 km (Long strip)	44km x 112km (Large area collect - 4 strips)	2.6 days at 30 degrees off-nadir	2008-09-06	>10	Operational	https://cdn1-originals.webdamdb.com/13264_95426677_2?Policy=eyJTdGF0ZW1lbnQiOlt7IlJlc291cmNlIjoiaHR0cCo6Ly9jZG4xLW9yaWdpbmFscy53ZWJkYW1kYi5jb20vMTMyNjRfOTU0MjY2NzdfMiIsIkNvbmRpdGlvbiI6eyJEYXRlTGVzc1RoYW4iOnsiQVdTOkVwb2NoVGltZSI6MjE0NzQxNDQwMH19fV19&Signature=o6rjOmBexgUiGVWFiW~KfP4TRU8I5AtIOhPowExQVL1fSsHp1s4xeKtWwMFLbX0IjbMZu~veCmAWaH7jp9ucoh8rmJEapc4VsD-OJgf1j0cepJL2X~kdumYndmwWxyTzLHQdL0SMSv12…
IKONOs	DigitalGlobe Corporation/Maxar Technologies Inc.	Commercial	Sun-Synchronous	0.8m	3.2m	4	240,000 km² per day	11.3km x 360 km (Long strip)	51km x 112km (Large area collect - 5 strips)	Approx. 3 days	1999-09-24	12+	Decommisioned	https://cdn1-originals.webdamdb.com/13264_95426682_2?Policy=eyJTdGF0ZW1lbnQiOlt7IlJlc291cmNlIjoiaHR0cCo6Ly9jZG4xLW9yaWdpbmFscy53ZWJkYW1kYi5jb20vMTMyNjRfOTU0MjY2ODJfMiIsIkNvbmRpdGlvbiI6eyJEYXRlTGVzc1RoYW4iOnsiQVdTOkVwb2NoVGltZSI6MjE0NzQxNDQwMH19fV19&Signature=Wbj0tTlxPjrcVnfhajjp9yuj-RvU7V6FrHrgYM3F2SKuHTOEqWnQuOwnJB8ejD-balGwxyChKgahbwqaWZJDYXvYouWYV3Uv89bVEEPNefYkZ597aCJKMAfpcMDQcM3fJ4hgRTnaSoo2…
KazEOSat-1	Kazcosmos	Government	Sun-Synchronous	1m	4m	4	220,000 km2 per day	20km			2014-04-30	7.25	Operational	https://directory.eoportal.org/web/eoportal/satellite-missions/k/kazeosat-1 https://www.ucsusa.org/resources/satellite-database
KOMPSAT-2	Korea Aerospace Research Institute (KARI) / Earth-i	Government/Commercial	Sun-Synchronous	1m	4m	4		15km			2006-07-28	3	Operational	https://www.ucsusa.org/resources/satellite-database https://earthi.space/wp-content/uploads/2018/03/Earth-i-Tech-Spec-for-KOMPSAT.pdf
KOMPSAT-3A	Earth-i	Commercial	Sun-Synchronous	0.4m	1.6m	4		13km		4.2 Days	2015-03-25	4	Operational	https://www.ucsusa.org/resources/satellite-database https://earthi.space/wp-content/uploads/2018/03/Earth-i-Tech-Spec-for-KOMPSAT.pdf
KOMPSAT-3	Earth-i	Commercial	Sun-Synchronous	0.5m	2m	4		16km			2012-05-17	4	Operational	https://www.ucsusa.org/resources/satellite-database https://earthi.space/wp-content/uploads/2018/03/Earth-i-Tech-Spec-for-KOMPSAT.pdf
OrbView-3	Orbital Imaging Corporation	Commercial		1m	4m						2003-06-26	2003-2007	Decommisioned	https://directory.eoportal.org/web/eoportal/satellite-missions/o/orbview-3
Pléiades 1A	AIRBUS Defence & Space (Astrium)	Commercial	Sun-Synchronous	0.5m	2m	4	1 million km² per day	20 km x 280 km	100 km x 100 km	Daily	2011-12-16	5	Operational	https://www.intelligence-airbusds.com/en/8692-pleiades https://www.satimagingcorp.com/satellite-sensors/pleiades-1/
Pléiades 1B	AIRBUS Defence & Space (Astrium)	Commercial	Sun-Synchronous	0.5m	2m	4	1 million km² per day	20 km x 280 km	100 km x 100 km	Daily	2012-12-02	5	Operational	https://www.intelligence-airbusds.com/en/8692-pleiades https://www.satimagingcorp.com/satellite-sensors/pleiades-1b/
Quickbird	DigitalGlobe Corporation/Maxar Technologies Inc.	Commercial	Sun-Synchronous	0.55m	2.16m	4	200,000 km² per day	18km x 360 km (Long strip)	N/A	2.5 days (5.6 days at 20 degrees off-nadir or less)	2001-10-18	Early 2014	Decommisioned	https://cdn1-originals.webdamdb.com/13264_95713155_2?Policy=eyJTdGF0ZW1lbnQiOlt7IlJlc291cmNlIjoiaHR0cCo6Ly9jZG4xLW9yaWdpbmFscy53ZWJkYW1kYi5jb20vMTMyNjRfOTU3MTMxNTVfMiIsIkNvbmRpdGlvbiI6eyJEYXRlTGVzc1RoYW4iOnsiQVdTOkVwb2NoVGltZSI6MjE0NzQxNDQwMH19fV19&Signature=hEBzIriVjRjhTceaUaxssRSxDhKYAsQSATVTlUxd3cG7llpgeVUIC~Oyz0~5FFYJHLcIJmA9R2QkHn5rCeGqtSb3hJW8fmQ5VPQLmD2i7ZwAins0zjtb92Gk~iAhGGUONrC6Bq2vQWJ9…
SkySat-1	Planet Labs, Inc.	Commercial	Sun-Synchronous - Polar inclined	0.8m	1.0m	4		8km at nadir		>1 Day	2013-11-21	4	Operational	https://www.ucsusa.org/resources/satellite-database https://www.planet.com/products/satellite-imagery/files/Planet_Combined_Imagery_Product_Specs_December2017.pdf https://directory.eoportal.org/web/eoportal/satellite-missions/s/skysat https://www.satimagingcorp.com/satellite-sensors/skysat-1/ and https://geocento.com/satellite-imagery-gallery/skysat/
SuperView - 1	Beijing Space View Technology Co. Ltd.	Commercial	Sun-Synchronous	0.5m	2m	4	900,000 km² per day	12km	Yes	2 Days	2018-01-09	8	Operational	https://www.satimagingcorp.com/satellite-sensors/superview-1/ https://www.ucsusa.org/resources/satellite-database
TELEOS-1	AgilSpace	Commercial	Equatorial	1m	N/A	0 (panchromatic only)		12km at nadir		12-16 hours	2015-12-16	5	Operational	https://www.agilspace.com/pdf/TeLEOS-1_Brochure.pdf
TripleSat	Earth-i	Commercial	Sun-Synchronous	1m (at nadir 0.8m)	4m (at nadir 3.2m)	4	634,441 km² per day	23.8km x 4000 km	42 km x 47.2km (2 scenes)	Daily	2015-07-10		Operational	https://earthi.space/constellations/ https://www.satimagingcorp.com/satellite-sensors/triplesat-satellite/
VividX2	Earth-i	Commercial	Sun-Synchronous	N/A	1m	3		5km by 5km scene size			2018-01-12	Service Demonstrator for 15 new satellites as part of Vivid-i	Operational	https://earthi.space/constellations/
Vision-1 (S1-4)	Airbus Defence & Space (Astrium)	Commercial	Sun-Synchronous	0.9m	3.5m	4		20.8km		Daily to 8 days depending on latitude and partner satellites	2018-09-16	8	Operational	https://www.google.com/url?sa=t&rct=j&q=&esrc=s&source=web&cd=&ved=2ahUKEwiRj-vg1aztAhVNasAKHS4PAWoQFjABegQIBRAC&url=https%3A%2F%2Fwww.intelligence-airbusds.com%2Fautomne%2Fapi%2Fdocs%2Fv1.0%2Fdocument%2Fdownload%2FZG9jdXRoZXF1ZS1kb2N1bWVudC02MDIyNg%3D%3D%2FZG9jdXRoZXF1ZS1maWxlLTYwMjI1%2FVision-1_web_201906.pdf&usg=AOvVaw0tX9QJXXFqrYMZJnpMtqsG
Worldview 1	Maxar Technologies Inc.	Commercial	Sun-Synchronous	0.5m	N/A	0 (panchromatic only)	1.3 million km² per day	17.7km x 360 km (Long strip)	138km x 111km (Large area collect - 6 strips)	1.7 days (5.4 days at 20 degrees off-nadir or less)	2007-09-18	10 to 12	Operational	https://cdn1-originals.webdamdb.com/13264_95586192_2?Policy=eyJTdGF0ZW1lbnQiOlt7IlJlc291cmNlIjoiaHR0cCo6Ly9jZG4xLW9yaWdpbmFscy53ZWJkYW1kYi5jb20vMTMyNjRfOTU1ODYxOTJfMiIsIkNvbmRpdGlvbiI6eyJEYXRlTGVzc1RoYW4iOnsiQVdTOkVwb2NoVGltZSI6MjE0NzQxNDQwMH19fV19&Signature=OtHe-zph5OxZKYe0v0Ulbncd7jSdhP2b6UrWNuraLUi7SmM6eVDn1uzkwKositzOcBJG9epARSecFPhc5a8RguNEpY1JZq3ntZkWoJ~wbzljrsa6Leu6Yg~jWnEBdggm5mONAYOH61yH…
Worldview 2	Maxar Technologies Inc.	Commercial	Sun-Synchronous	0.46m	1.85m	8	1 million km² per day	16.4km x 360 km (Long strip)	138km x 112km (Large area collect - 8 strips)	1.1 days (3.7 days at 20 degrees off-nadir or less)	2009-10-08	10 to 12	Operational	https://cdn1-originals.webdamdb.com/13264_95553824_2?Policy=eyJTdGF0ZW1lbnQiOlt7IlJlc291cmNlIjoiaHR0cCo6Ly9jZG4xLW9yaWdpbmFscy53ZWJkYW1kYi5jb20vMTMyNjRfOTU1NTM4MjRfMiIsIkNvbmRpdGlvbiI6eyJEYXRlTGVzc1RoYW4iOnsiQVdTOkVwb2NoVGltZSI6MjE0NzQxNDQwMH19fV19&Signature=VUz~WMdhrbdAbr0K0aofpf7Xi3SxZHPrNEu9f41by25RyXFowZ9xzBaxme8qiBxfwTS4nboaIrKpV8TAu9nAO8KLHbtp1bUZtglmNZVppQNf67GCp6V7Z2lxOKs1ZBXdImFrm5ErvjiF…
Worldview 3	Maxar Technologies Inc.	Commercial	Sun-Synchronous	0.31m	1.24m	8	680,000 km² per day	13.1km x 360 km (Long strip)	66.5km x 112km (Large area collect - 5 strips)	1 day (4.5 days at 20 degrees off-nadir or less)	2014-08-13	10 to 12	Operational	https://cdn1-originals.webdamdb.com/13264_95553821_2?Policy=eyJTdGF0ZW1lbnQiOlt7IlJlc291cmNlIjoiaHR0cCo6Ly9jZG4xLW9yaWdpbmFscy53ZWJkYW1kYi5jb20vMTMyNjRfOTU1NTM4MjFfMiIsIkNvbmRpdGlvbiI6eyJEYXRlTGVzc1RoYW4iOnsiQVdTOkVwb2NoVGltZSI6MjE0NzQxNDQwMH19fV19&Signature=BEqXy6sytR2UuKaMvIUK~~UewiLeZzQ1JwwSO-aAd85D82i0Uce~zaSD4myrAgg~42-PhJMTtaZeSa7EvBHz-s6EWLPLRC5uKHDEZy6xDqvlS5Wbv9p0N680In5tE-v-22tv8gIjHRwl…
Worldview 4	Maxar Technologies Inc.	Commercial	Sun-Synchronous	0.31m	1.23m	4	680,000 km² per day	13.1km x 360 km (Long strip)	66.5km x 112km (Large area collect - 5 strips)	1 day	2016-11-11	10 to 12	Decommisioned	https://cdn1-originals.webdamdb.com/13264_95553822_2?Policy=eyJTdGF0ZW1lbnQiOlt7IlJlc291cmNlIjoiaHR0cCo6Ly9jZG4xLW9yaWdpbmFscy53ZWJkYW1kYi5jb20vMTMyNjRfOTU1NTM4MjJfMiIsIkNvbmRpdGlvbiI6eyJEYXRlTGVzc1RoYW4iOnsiQVdTOkVwb2NoVGltZSI6MjE0NzQxNDQwMH19fV19&Signature=cg8kvIaeYythF0DqWaBXgQdHKtLdGcY~uRgnyHo7G82hUcqwG0Rdib9gguM9LhlL2MFlldWPDc0NJnNK-49JA-BkSv9bGtsq78XSRzpyzj088tNzApxwlKi8bImtSy0wfWoF~o42OnFl…
														Access date: November 28, 2020
