# Supplementary material for: Cetacean Strandings From Space: Challenges and Opportunities of Very High Resolution Satellites for the Remote Monitoring of Cetacean Mass Strandings
Source: Frontiers journal article supplement (doi:10.3389/fmars.2021.650735), 2021-11-18
Supplement: Table_2.xlsx [file Table_2.xlsx]

## Sheet: Mysticeti
ID	Species	Location	*Latitude	*Longitude	Number of individuals	Age of Individuals	Cause	Date	Reference
1	Rorqual	Caleta Buena/slight inlet, Southern Chile			Four fresh, numerous skeletons		Unknown	Nov/Dec 1977	M. Salas, 2015, personal communication
2	Humpback	Cape Cod (USA)	41.9051	-70.0744	14		HAB (saxitoxin)	Five weeks (11/1987)	Geraci et al. (1989)
3	Fin, minke and bryde1	Upper Gulf of California (Mexico)	29.7819	-114.275	Eight		Unknown	? (1995)	Vidal & Gallo Reynoso (1996)
4	Gray	Eastern North East Pacific	Indicated by blue line		283	Mostly adults	Malnutrition?	Throughout 1999	Gulland et al. (2005)
5	Gray	Eastern North East Pacific	Indicated by blue line		368	Mostly adults	Malnutrition?	Throughout 2000	Gulland et al. (2005)
6	Unknown	Upper Gulf of California (Mexico)	31.2104	-114.094	10		Unknown	? (2009)	Rowntree et al. (2013)
7	Humpback	Australia	Indicated by blue line		46	Mostly calves and juveniles	Unknown	Throughout 2009	Coughran, Gales & Smith (2013)
8	Humpback	Brazil	Indicated by blue line		96	Mostly calves and juveniles	Unknown	Throughout 2010	Rowntree et al. (2013)
9	Southern right	Peninsula Valdés (Argentina)	-42.4638	-64.512	420	Mostly calves	Unknown (HAB-related? Starvation? Kelp gull harassment?)	2005–2013	D’Agostino et al. (2015); Wilson et al. (2015) or Rowntree et al. (2013)
10	Sei and/or minke	Puerto Edén area (Chile)	-49.124	-74.3984	Three		Unknown	2011-03-01	Häussermann et al. 2015)
11	Sei and/or minke	Estero Cono (Chile)	-46.6044	-75.4755	15		Unknown	2011-03-01	R.M. Fischer, 2015, personal communication
12	Sei and/or minke	Puerto Edén area (Chile)	-49.124	-74.3984	Five		Unknown	2014-01-01	C. Cristie, 2015, personal communication
13	Probably all sei	Between 46 and 51°S, mainly Golfo de Penas (Chile)	-47.2194	-75.0147	343	All	HAB	Feb to early Apr 2015	Häussermann et al. 2015)
*14	Fin, humpback, gray	Alaska/British Columbia (USA/Canada)	Indicated by blue line		46 whales, including 34 for Alaska (12 fin, 22 humpback) and 12 for British Columbia, Canada (5 fin, 7 humpback)		Undetermined - ecological factors were a contributory cause (i.e., the 2015 El Nino, Warm Water Blob and Pacific Coast Domoic Acid Bloom	May 22, 2015, to December 31, 2015, in the Gulf of Alaska and from April 23, 2015, to April 16, 2016, in British Columbia	NOAA (2015b). Updated using: https://www.fisheries.noaa.gov/national/marine-life-distress/2015-2016-large-whale-unusual-mortality-event-western-gulf-alaska https://www.google.com/url?sa=t&rct=j&q=&esrc=s&source=web&cd=&ved=2ahUKEwjKhKWqtq_qAhWkmFwKHalJDH0QFjAAegQIAhAB&url=https%3A%2F%2Frepository.library.noaa.gov%2Fview%2Fnoaa%2F17715%2Fnoaa_17715_DS1.pdf&usg=AOvVaw2EjKK8veHOJZFW7lxOc_pY
*15	Humpback	Maine to Florida	Indicated by blue line		88		Unknown, though 20 had signs of blunt force trauma - ship strike (believed to be vessell interactions and engtanglement by Virginia Beach Aquarium)	Since Jan 2016 - mid Feb 2017 (15 in 2017)	https://www.nationalgeographic.com/animals/2019/03/humpback-whales-unusual-mortality-event/ or 126, January 2016-2020 https://www.fisheries.noaa.gov/national/marine-life-distress/2016-2020-humpback-whale-unusual-mortality-event-along-atlantic-coast
*16	NARW	12 in the Gulf of St. Lawrence, Canada and 5 in US waters	48.9224	-59.6615	17		5 of these 17 deaths were due to vessel strikes and 4 to entanglement, rest unknown	2017
*17	Minke	Atlantic Ocean (Maine to South Carolina)	Indicated by blue line				Suspected human interaction (entaglement)/infectious disease	2018	https://www.fisheries.noaa.gov/national/marine-life-distress/active-and-closed-unusual-mortality-events
*18	Gray Whale	Pacific - Mexico through to Alaska	Indicated by blue line		340		Undetermined	2019	https://www.fisheries.noaa.gov/national/marine-life-distress/active-and-closed-unusual-mortality-events or https://www.fisheries.noaa.gov/national/marine-life-distress/2019-2020-gray-whale-unusual-mortality-event-along-west-coast-and
